# Supplementary material for: Evaluating China's fossil-fuel CO 2 emissions from a comprehensive dataset of nine inventories
Source: Copernicus journal article supplement (doi:10.5194/acp-2019-643), 2020-01-06
Supplement: Supplementary file 1 [file acp-2019-643-supplement.pdf]

1 *Supplement of*

2 **Evaluating China's fossil-fuel CO<sub>2</sub> emissions from a comprehensive dataset of**  
3 **nine inventories**

4 Pengfei Han<sup>1\*</sup>, Ning Zeng<sup>2\*</sup>, Tom Oda<sup>3</sup>, Xiaohui Lin<sup>4</sup>, Monica Crippa<sup>5</sup>, Dabo Guan<sup>6,7</sup>,  
5 Greet Janssens-Maenhout<sup>5</sup>, Xiaolin Ma<sup>8</sup>, Zhu Liu<sup>6,9</sup>, Yuli Shan<sup>10</sup>, Shu Tao<sup>11</sup>, Haikun  
6 Wang<sup>8</sup>, Rong Wang<sup>11,12</sup>, Lin Wu<sup>4</sup>, Xiao Yun<sup>11</sup>, Qiang Zhang<sup>13</sup>, Fang Zhao<sup>14</sup>, Bo  
7 Zheng<sup>15</sup>

8

9 <sup>1</sup>State Key Laboratory of Numerical Modeling for Atmospheric Sciences and  
10 Geophysical Fluid Dynamics, Institute of Atmospheric Physics, Chinese Academy of  
11 Sciences, Beijing, China

12 <sup>2</sup>Department of Atmospheric and Oceanic Science, and Earth System Science  
13 Interdisciplinary Center, University of Maryland, College Park, Maryland, USA

14 <sup>3</sup>Goddard Earth Sciences Research and Technology, Universities Space Research  
15 Association, Columbia, MD, United States

16 <sup>4</sup>State Key Laboratory of Atmospheric Boundary Layer Physics and Atmospheric  
17 Chemistry, Institute of Atmospheric Physics, Chinese Academy of Sciences, Beijing,  
18 China

19 <sup>5</sup>European Commission, Joint Research Centre (JRC), Directorate for Energy,  
20 Transport and Climate, Air and Climate Unit, Ispra (VA), Italy

21 <sup>6</sup>Department of Earth System Science, Tsinghua University, Beijing, China

22 <sup>7</sup>Water Security Research Centre, School of International Development, University of

23 East Anglia, Norwich, UK

24 <sup>8</sup>State Key Laboratory of Pollution Control and Resource Reuse, School of the  
25 Environment, Nanjing University, Nanjing, China

26 <sup>9</sup>Tyndall Centre for Climate Change Research, School of International Development,  
27 University of East Anglia, Norwich, UK

28 <sup>10</sup>Energy and Sustainability Research Institute Groningen, University of Groningen,  
29 Groningen 9747 AG, Netherlands

30 <sup>11</sup>Laboratory for Earth Surface Processes, College of Urban and Environmental  
31 Sciences, Peking University, Beijing, China

32 <sup>12</sup>Department of Environmental Science and Engineering, Fudan University, Shanghai,  
33 China

34 <sup>13</sup>Ministry of Education Key Laboratory for Earth System Modeling, Department of  
35 Earth System Science, Tsinghua University, Beijing, China

36 <sup>14</sup>Key Laboratory of Geographic Information Science (Ministry of Education), School  
37 of Geographic Sciences, East China Normal University, Shanghai, China

38 <sup>15</sup>Laboratoire des Sciences du Climat et de l'Environnement, CEA-CNRS-UVSQ,  
39 UMR8212, Gif-sur-Yvette, France

40 \***Correspondence:** pfhan@mail.iap.ac.cn; zeng@umd.edu

41 **Figure S1**

42

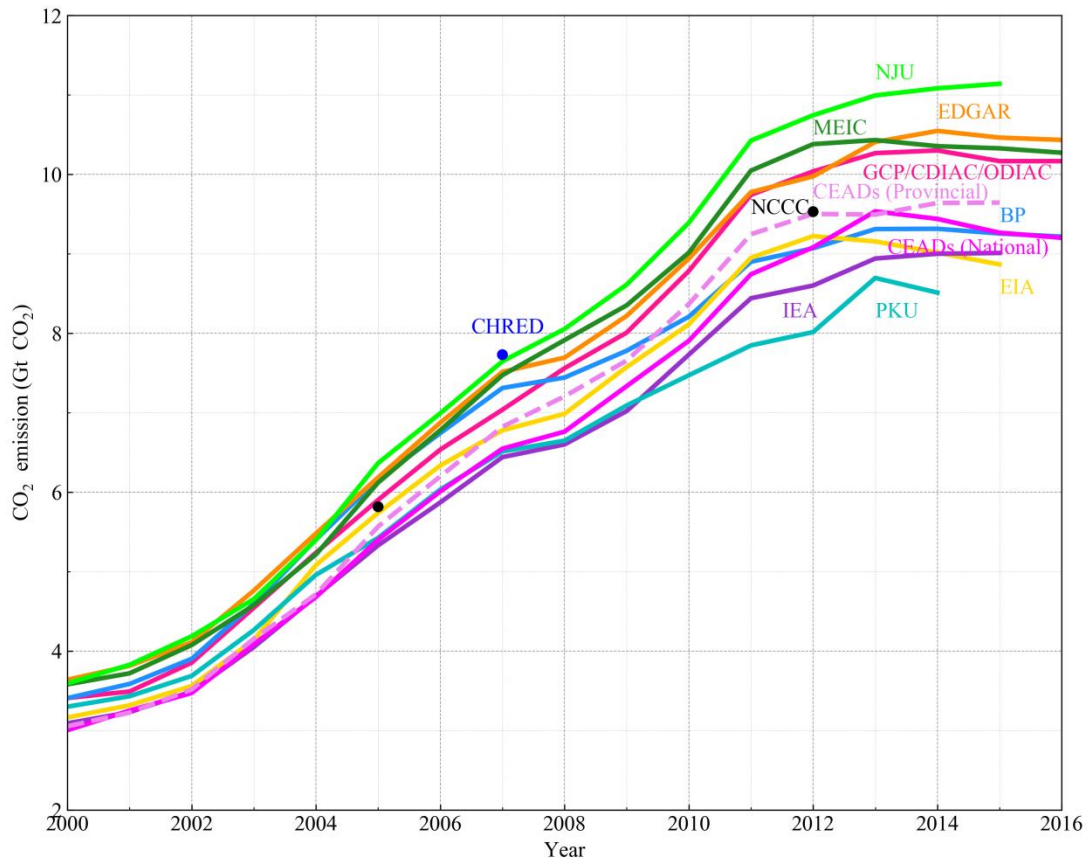

43

44 Fig. S1 China's total FFCO<sub>2</sub> emissions from 2000 to 2016. The emissions are from  
45 combustion of fossil fuels and cement production from different sources (IEA, EIA  
46 and BP estimates do not include cement production. EDGARv4.3.2\_FT2016 includes  
47 international aviation and marine bunkers emissions). The values for 6 gridded  
48 emission inventories are tabular data provided by data developers before spatial  
49 disaggregation (e.g. (Oda, 2018)). For GCP data prior to 2014, it was from CDIAC  
50 and 2015-2016 was calculated based on BP data and fraction of cement production  
51 emission in 2014(Le Quéré 2018).

52 **Figure S2**

53

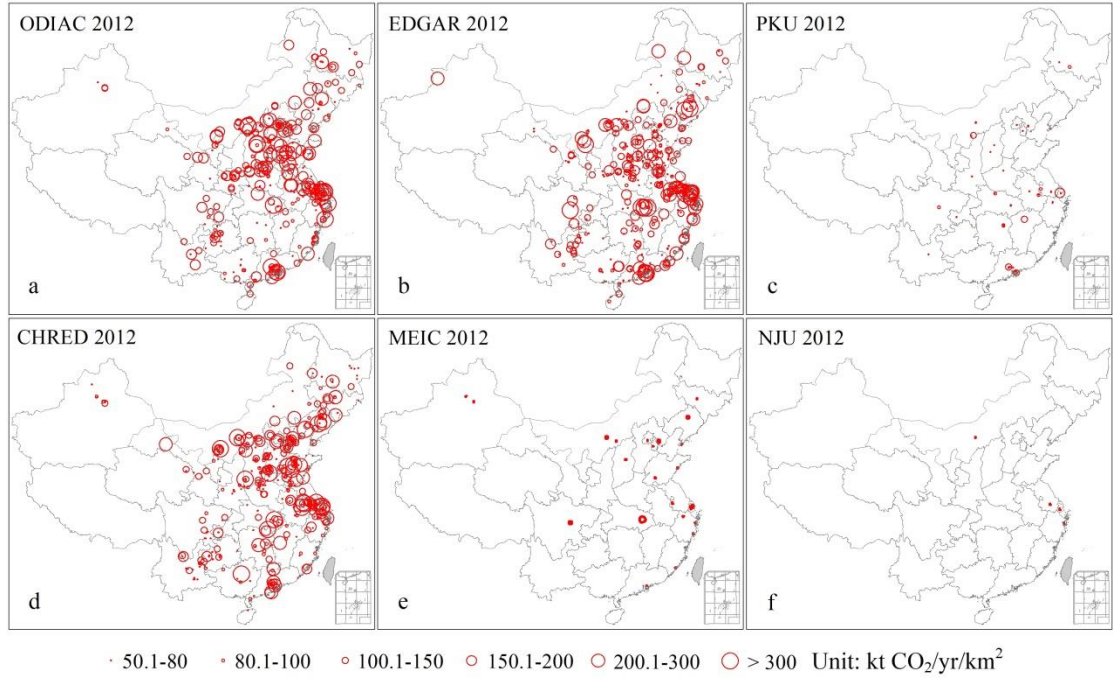

54

55 Figure S2 High-emitting grids bubble plots for ODIAC, EDGAR, PKU, CHRED,

56 MEIC and NJU in 2012 at 10 km resolution.

57

58

59 **Figure S3**

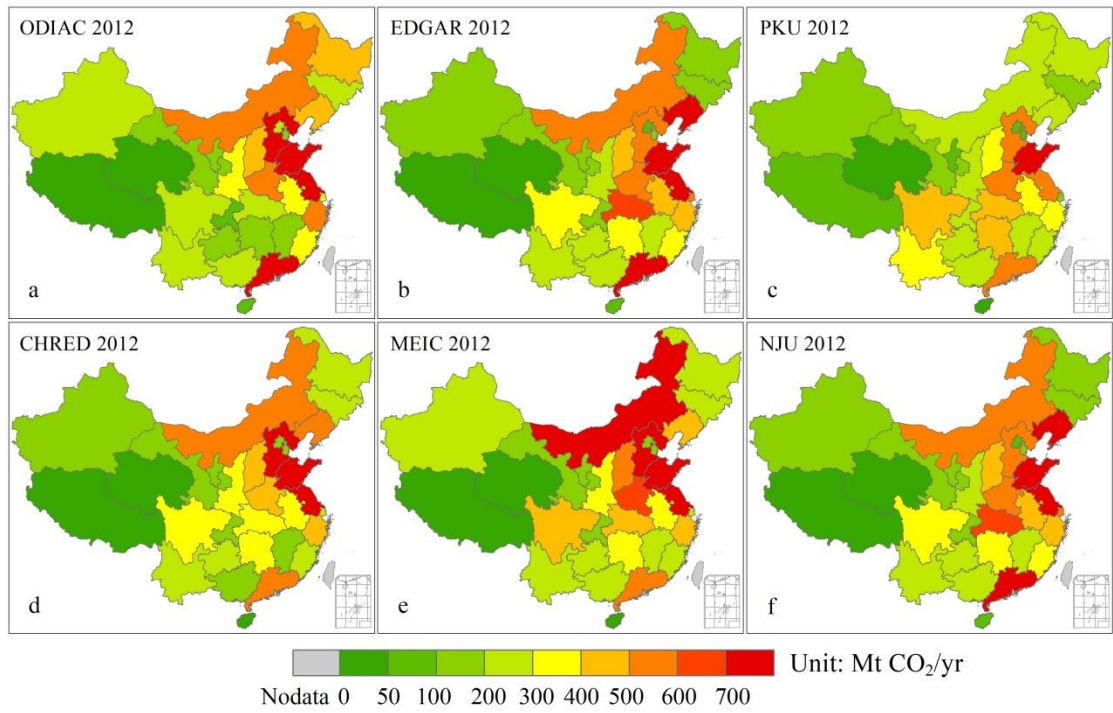

60

61 Figure S3 The spatial distribution of provincial total emissions for ODIAC, EDGAR,

62 PKU, CHRED, MEIC and NJU in 2012.

63

64

65 **Table S1**

66 Table S1 Summary of total emission estimates\*

| Data                        | ODIAC2016                                                | EDGARv432                                                                             | PKU                                                                                     | CHRED                                                                                   | MEIC                                       | NJU                                                                       | CEADs                                                                             |
|-----------------------------|----------------------------------------------------------|---------------------------------------------------------------------------------------|-----------------------------------------------------------------------------------------|-----------------------------------------------------------------------------------------|--------------------------------------------|---------------------------------------------------------------------------|-----------------------------------------------------------------------------------|
| Emission estimates          | Global & National                                        | National                                                                              | Subnational                                                                             | Provincial                                                                              | Provincial                                 | Provincial                                                                | National, provincial, city                                                        |
| Emission sectors/categories | Fuel type: Point; Nonpoint; Cement production; Gas flare | IPCC sector: Fossil fuel production; Industrial processes; Agriculture; International | Fuel type: 64 fuel sub-types in 6 sectors. Energy production; Industry; Transportation; | IPCC sector: Industry; Service; Urban and rural households; Transportation; Agriculture | IPCC sector: Power; Industry; Residential; | IPCC sector: Power plants; Industrial energy consumption; Transportation; | Fuel type: 17 fuel types in 47 sectors. Energy production; Industry; process only |

|                                   |                                                   |                            |                                                           |                                         |                      |                                                   |                                                                    |
|-----------------------------------|---------------------------------------------------|----------------------------|-----------------------------------------------------------|-----------------------------------------|----------------------|---------------------------------------------------|--------------------------------------------------------------------|
|                                   |                                                   | aviation and<br>bunkers    | Residential and<br>commercial;<br>Agriculture;<br>Natural |                                         |                      | consumption;<br>Industrial<br>processes;<br>Waste | cement<br>production;<br>Service; Urban<br>and rural<br>households |
| Emission<br>calculation<br>method | Apparent<br>consumption                           | Sectoral<br>approach       | Apparent<br>consumption                                   | Sectoral<br>approach                    | Sectoral<br>approach | Sectoral<br>approach                              | Apparent<br>consumption                                            |
| Fuel data used                    | UN statistics<br>(Boden, 2016),<br>and (BP, 2016) | (IEA, 2014),<br>(BP, 2016) | (IEA, 2014)                                               | FCPSC (2011);<br>(Wang et al.,<br>2014) | (NBS, 2018)          | (NBS, 2016)                                       | (NBS, 2016)                                                        |

|                            |       |       |       |       |       |       |       |
|----------------------------|-------|-------|-------|-------|-------|-------|-------|
| Emission factor            |       |       |       |       |       |       |       |
| for raw coal (tC           | 0.746 | 0.713 | 0.510 | 0.518 | 0.491 | 0.518 | 0.499 |
| per t of coal)             |       |       |       |       |       |       |       |
| Emission factor            |       |       |       |       |       |       |       |
| for oil (tC per t          | 0.850 | 0.838 | 0.758 | 0.839 | 0.829 | 0.820 | 0.829 |
| of oil)                    |       |       |       |       |       |       |       |
| Emission factor            |       |       |       |       |       |       |       |
| for natural gas            |       |       |       |       |       |       |       |
| (tC per                    | 0.521 | 0.521 | 0.651 | 0.591 | 0.584 | 0.590 | 0.584 |
| thousand m <sup>3</sup> of |       |       |       |       |       |       |       |
| natural gas)               |       |       |       |       |       |       |       |



|             |                |      |               |     |      |                |                     |
|-------------|----------------|------|---------------|-----|------|----------------|---------------------|
| Uncertainty | 17.5% (95% CI) | ±15% | ±19% (95% CI) | ±8% | ±15% | 7-10% (90% CI) | -15% - 25% (95% CI) |
|-------------|----------------|------|---------------|-----|------|----------------|---------------------|

Notes

Estimates are based on CDIAC. Uncertainty estimate is based on (Andres et al., 2014)

Uncertainties for non-Annex I countries from (Olivier et al., 2015)

Monte Carlo simulations of 1000 times on all grids for the activity data and emission factors' PDFs

The uncertainty of activity data and emission factors is no more than 6% and 5%

Monte Carlo simulations of 10,000 times for input parameter PDFs

Monte Carlo simulations of 100,000 times for the activity data and emission factors' PDFs

7-10% (90% CI)

67 \* CI: Confidence interval; PDFs: Probability density functions.

68 **Table S2**

69 Table S2 Summary of spatial disaggregation approach\*

|              | Data               | ODIAC                                                                      | EDGAR                              | PKU                                                  | CHRED                                     | MEIC                                      | NJU                                  | CEADs                      |
|--------------|--------------------|----------------------------------------------------------------------------|------------------------------------|------------------------------------------------------|-------------------------------------------|-------------------------------------------|--------------------------------------|----------------------------|
|              |                    |                                                                            |                                    |                                                      |                                           |                                           |                                      | national,                  |
|              | Spatial resolution | 1 km                                                                       | 0.1 degree                         | 0.1 degree                                           | 10 km                                     | 0.25 degree                               | 0.25 degree                          | provincial,<br>city scales |
| Point source | Data               | CARMA2.0                                                                   | CARMA3.0                           | CARMA2.0                                             | FCPSC                                     | CPED                                      | CEC;ACC;C<br>CTEN                    | N/A                        |
|              | Notes              | Geolocation and<br>emission estimates<br>for 720 point<br>sources in China | 1706 point<br>sources for<br>China | 715 in year<br>2000 and<br>1007 in 2007<br>for China | 1.58 million<br>industrial<br>enterprises | A unit-based<br>2320 power<br>plants data | 240-824<br>PP+CP during<br>2000-2016 | N/A                        |

---

|             |      |                 |                                                                                                                                 |                                 |                                                                               |                                    |                            |     |
|-------------|------|-----------------|---------------------------------------------------------------------------------------------------------------------------------|---------------------------------|-------------------------------------------------------------------------------|------------------------------------|----------------------------|-----|
| Line source | Data | N/A             | the<br>OpenStreetM<br>ap and<br>OpenRailway<br>Map (using<br>different<br>weighting<br>factors), Int.<br>aviation and<br>bunker | N/A                             | The national<br>road, railway,<br>navigation<br>network, and<br>traffic flows | Transport<br>networks              | N/A                        | N/A |
|             | Data | Nighttime light | Population<br>density,<br>nighttime                                                                                             | Vegetation<br>and<br>population | Population<br>density, land<br>use, human                                     | Population<br>density, land<br>use | Population<br>density, GDP | N/A |

---

|       |                       |              |              |                |     |                             |
|-------|-----------------------|--------------|--------------|----------------|-----|-----------------------------|
|       |                       | light        | density,     | activity       |     |                             |
|       |                       |              | nighttime    |                |     |                             |
|       |                       |              | light        |                |     |                             |
|       |                       | INP          |              | INP includes   |     |                             |
|       | Street light might    | includes CP, | INP          | CP, lime       |     | INP includes                |
|       | help for line sources | iron and     | includes CP, | production,    |     | cement and INP only         |
|       | (Oda, 2011); 1km      | steel,       | coke, brick  | iron and steel |     | glass, include CP           |
| Notes | data do not include   | non-ferrous  | and          | production,    | N/A | chemical, and (75% of total |
|       | int. aviation and     | metals and   | aluminum     | glass          |     | metal INP)                  |
|       | bunker                | various      | production   | production,    |     | productions                 |
|       |                       | chemicals    |              | and ammonia    |     |                             |
|       |                       |              |              | production.    |     |                             |

70 \* INP: Industry process; CP: Cement production; PP: Power plants; N/A: Not available

## 71 **Methodology and source data of main data sets**

### 72 **1. ODIAC-The Open-source Data Inventory for Anthropogenic CO<sub>2</sub>**

73 The Open-source Data Inventory for Anthropogenic CO<sub>2</sub> (ODIAC) is a global  
74 monthly high-resolution (1x1km) gridded fossil fuel CO<sub>2</sub> emission data product(Oda,  
75 2018;Oda, 2011). This high-resolution emission dataset was originally designed for  
76 high-resolution atmospheric CO<sub>2</sub> tracer transport model simulations and flux  
77 inversions.

78 ODIAC is primarily based on country emission estimates made by the Carbon  
79 Dioxide Information Analysis Center (CDIAC) at the Oak Ridge National Laboratory.  
80 The CDIAC emission estimates are made by fuel types such as coal, gas, oil (e.g.  
81 Marland and Rotty, 1984(Marland and Rotty, 1984)). CDIAC estimates also include  
82 emissions from cement production, gas flaring and international bunker. Emissions for  
83 the recent years are projected using BP. Major improves than previous ODIACv1.7  
84 includes: (1) the use of the CDIAC emissions estimates instead of our own estimates,  
85 (2) the use of multiple spatial emissions disaggregation methods to distribute CDIAC  
86 national emission estimates, and (3) the inclusion of temporal variations. We  
87 extrapolated the 2013 CDIAC emissions to years 2014 and 2015 using the 2016  
88 version of the BP global fuel statistical data(BP, 2016). We simply used the same  
89 fractions of emissions from cement production and gas flaring in 2013 (approximately  
90 5.7 and 0.6 % of the global total; Boden et al., 2016(Boden, 2016)). International  
91 bunker emissions were scaled using changes in national total emissions.

92 The ODIAC spatially distributes emissions in two steps. First, the power plant  
93 emissions are mapped using the geolocation and emission estimates of point sources  
94 taken the Carbon Monitoring for Action (CARMA2.0)(Wheeler and Ummel, 2008).  
95 We might have less point sources than others with CARMA 2.0 and 3.0 as we  
96 eliminated some of the point sources with wrong geolocations after visual inspection  
97 (720 point sources in China left). The number of the point sources remains the same  
98 across years, and emission magnitude was scaled by national totals. The spatial  
99 distributions of the rest of the emissions (the total emission minus point source  
100 emissions) are then estimates using the nighttime light data collected from the  
101 Defense Meteorological Satellite Program (DMSP) satellites(Oda, 2018;Oda, 2011).  
102 We used a product that does not have an instrument saturation issue rather than a  
103 regular nighttime light product(Ziskin, 2010). The improved nighttime light data have  
104 mitigated the underestimation of emissions over dimmer areas seen in ODIAC  
105 v1.7(Oda, 2010).We separately distributed CDIAC gas flare emissions using a 1×1  
106 km nighttime light-based gas flare maps(Elvidge et al., 2009). We identified and  
107 excluded bright gas flare pixels before distributing emissions using a global nighttime  
108 light product that was specifically developed for gas flares by NOAA, National  
109 Centers for Environmental Information (NCEI, formerly National Geophysical Data  
110 Center, NGDC)(Oda, 2011).

111 The year 2017 version was used of the ODIAC data product  
112 (ODIAC2017(Tomohiro Oda, 2015)) that covers from 2000 to 2016. The data product  
113 is available from the Center for Global Environmental Research (CGER,

114 <http://db.cger.nies.go.jp/dataset/ODIAC/>).

## 115 **2. EDGAR-The Emission Database for Global Atmospheric Research (EDGAR)**

### 116 **V4.3.2**

#### 117 **Overview**

118 The Emissions Database for Global Atmospheric Research is a comprehensive  
119 global gridded emission dataset that indicates greenhouse gases and atmospheric  
120 pollutants. The first version of EDGAR (EDGAR v2) was firstly published by Olivier  
121 et al. (1996)(Olivier, 1996) (<http://edgar.jrc.ec.europa.eu/index.php#>) and has been  
122 heavily used in the atmospheric chemistry and carbon cycle researches. In this study,  
123 we used the most updated version of EDGAR (EDGAR v4.3.2,  
124 -2014)(Janssens-Maenhout, 2017). The data are available from the EDGAR official  
125 website [http://edgar.jrc.ec.europa.eu/overview.php?v=432\\_GHG&SECURE=123](http://edgar.jrc.ec.europa.eu/overview.php?v=432_GHG&SECURE=123).

#### 126 **Emission calculations**

127 The emissions are calculated based on the latest scientific knowledge and best  
128 available global statistics, following methods defined by IPCC (2006)(IPCC, 2006).  
129 Emission factors are technology-specific for different processes. Emissions reported  
130 by countries, such as UNFCCC, are not used to keep internal consistency and  
131 impartiality in the database. In EDGAR, country total CO<sub>2</sub> emissions (E) are  
132 calculated using the following equation:

$$133 \quad E = \sum_{i,j,k} [AD_i * TECH_{i,j} * EOP_{i,j,k} * EF_{i,j} * (1 - RED_{i,j,k})] \quad (1)$$

134 where  $i$  is a given sector, AD refers to activity data,  $j$  is technology (TECH),  $k$   
135 represents (end-of-pipe) abatement measure (EOP) installed with share  $k$  for each  
136 technology  $j$ , EF refers to uncontrolled emission factor and RED is relative reduction  
137 by abatement measure  $k$ . The activity data include consumed energy (TJ) of a certain  
138 fuel, the amount of products manufactured, etc. CO<sub>2</sub> emissions are mainly driven by  
139 the carbon content of the fuel in the combustion process. Technology-specific EFs are  
140 applied to different infrastructures (e.g. different distribution networks) or  
141 management processes. EDGAR v4.3.2 has monthly time step  
142 ([http://edgar.jrc.ec.europa.eu/overview.php?v=432\\_GHG&SECURE=123](http://edgar.jrc.ec.europa.eu/overview.php?v=432_GHG&SECURE=123)).

#### 143 **Definitions of source sectors**

144 The source sectors are defined according to the codes used in the 1996 IPCC  
145 guidelines, but with updates to the 2006 IPCC guidelines (IPCC, 2006)(IPCC, 2006)  
146 with all sectors related to fuel consumptions considered. By contrast, the Land-Use,  
147 Land-Use Change and Forestry sector is not included due to data limitation. Therefore,  
148 biomass burning (wild fire) is not included in this new version. For the CO<sub>2</sub> fluxes  
149 result from forests biomass, we use results from Petrescu et al. (2012)(Petrescu, 2012).  
150 This version is mostly based on international statistics such as IEA (2014)(IEA, 2014)  
151 and FAOSTAT (2014)(FAOSTAT, 2014), and raw data was preprocessed for  
152 completeness and consistency, such as removing outliers and filling holes with a  
153 linear interpolation for near year data. The national data from the Chinese Bureau for  
154 statistics is consulted to make sure the quality of activity data with consumption of



155 fuels (fossil and biofuel) and of products (such as cement, metals, chemicals and  
156 solvents). To ensure consistency and comparability, CO<sub>2</sub> emission factors are selected  
157 from the 2006 IPCC Guidelines for National Greenhouse Gas Inventories (IPCC,  
158 2006)(IPCC, 2006).

159 The input datasets for point, line and area sources were processed using GIS  
160 techniques for conversion, resampling and aggregation on a 0.1 ° × 0.1 ° grid  
161 resolution.

## 162 **Emission factors and Activity data**

### 163 **Energy statistics:**

164 Data for the annual energy content of fossil fuel consumption was derived from  
165 the IEA energy balance statistics (IEA, 2014)(IEA, 2014) for 1970-2012. This dataset  
166 comprises 64 fuel types and 94 fuel use activities. The biofuel data for China are  
167 supplemented with the data from USDA (2014)(USDA, 2014).

### 168 **Fossil fuel production statistics**

169 Based on the World Coal Association (2016)(association, 2016), the hard coal  
170 and brown coal production data have been separated into surface and underground  
171 mining. For gas transmission and distribution, the leakage rate is assumed  
172 proportional to the pipelines length and determined by its construction material.  
173 Pipeline length and 2012 material statistics are mainly taken from reports on Europe  
174 by the Eurogas (2010)(Eurogas, 2010) report and Marcogaz (2013)(Marcogaz, 2013)

175 technical sheet, UNFCCC National Inventory Reports (2014)(UNFCCC, 2014). The  
176 total amount of natural gas flared from 1994 onwards is primarily determined from  
177 the NOAA satellite observation of the intensity of flaring lights (Elvidge et al.  
178 2009)(Elvidge et al., 2009).

### 179 **Industrial processes statistics**

180 CO<sub>2</sub> from cement production is based on the Tier 1 EF for clinker production,  
181 whereas clinker production is calculated from cement production reported by USGS  
182 (2014)(USGS, 2014) using clinker to cement ratio from the China Cement Almanac.  
183 Iron and steel production is further split into technologies using data of WSA  
184 (2014)(WSA, 2015). For other CO<sub>2</sub> sources such as lime, soda ash and ammonia  
185 production, we combine USGS (2014)(USGS, 2014) and the UNFCCC  
186 (2014)(UNFCCC, 2014) data. Urea production data is from IFA (2015)(IFA, 2015),  
187 which considers the fossil carbon in CO<sub>2</sub> from ammonia production.

### 188 **Agricultural statistics**

189 Following IPCC (2006)(IPCC, 2006) methodology we apply FAO crop and  
190 livestock data and IPCC (2006) emission factors for CO<sub>2</sub>. Livestock numbers are  
191 combined with estimates for animal waste per head to estimate the total amount of  
192 animal waste produced. The fraction of crop residues removed from and burned in the  
193 field is estimated using data of Yevich and Logan (2003)(Yevich and Logan, 2003)  
194 and UNFCCC (2014)(UNFCCC, 2014) for the fraction burned in the field by Annex I

195 countries.

## 196 **Spatial modeling of emissions**

197 The spatial distribution of EDGAR is based on disaggregation of country  
198 sectoral total emissions. As an important input to global atmospheric transport and  
199 inversion models, EDGAR v4.3.2 disaggregates CO<sub>2</sub> emissions over a 0.1x0.1 grid.  
200 The emissions can be emitted either from a point source or a linear source or an area  
201 source. The line and area sources are distributed over the grid cells with the proxy  
202 data covering the globe entirely or partially, whereas the point sources are allocated to  
203 individual grid cells using geographical coordinate (lat and lon). A detailed  
204 description for spatial mapping is available in the EDGAR gridding  
205 manual(Janssens-Maenhout, 2013). A key proxy dataset is the gridded world  
206 population provided by the Center for International Earth Science Information  
207 Network (CIESIN) for the years 1990, 1995, 2000, 2005, 2010 and projected to  
208 2015(CIESIN: Center for International Earth Science Information Network - CIESIN  
209 - Columbia University et al., 2005). Industrial activities are mainly located at the plant  
210 location coordinates on the point source grid-maps. Power plant emissions have been  
211 distributed according to the CARMAv3.0 (2012)(CARMAv3.0, 2012) point source  
212 distribution. CARMA's point sources with low intensity are used to allocate emissions  
213 from auto-producing power or heat plants. A specific proxy was mainly developed for  
214 cement and lime for China based on the plant locations and annual throughput of the  
215 facility listed by the CEC (2014)(CEC, 2014, 2015) for China. Because of the

216 incompleteness of the list of cement factories, annual emission estimates per facility  
217 were applied. For the major coal producers, the coordinates of coal mines from the  
218 World coal association (2016)(association, 2016) are used to distribute emissions.  
219 Coal mine locations for China have been updated and extended with the data of Liu et  
220 al. (2015)(Liu et al., 2015). Line sources are exclusively used to describe emissions  
221 from the transport sector. For example, road maps can tell you where the roads are  
222 located, but the real question is how to distribute emissions on to the road map. So  
223 different proxy data layers for three road types worldwide (highways, primary and  
224 secondary, residential and commercial roads) obtained from the OpenStreetMap of  
225 Geofabrik (2015)(Geofabrik, 2015) are used with different weighting factors for the  
226 emission distribution, depending on road types. Similar data from OpenRailwayMap  
227 are used for railways. For inland waterways the maritime traffic lines (for ships and  
228 ferries) are composed from the navigable parts of rivers and lakes, using the  
229 hydrology map of Lehner et al. (2011)(Lehner et al., 2011). Wang et al.  
230 (2008)(Chengfeng et al., 2008) is used for international shipping. The spatial proxy  
231 for the aviation sector is derived from International Civil Aviation Organization(ICAO,  
232 2015) flight information. Input data regarding airports and routes are taken from  
233 “Airline Route Mapper”. It should be noted that point sources are jointly constrained  
234 by the country total. Line sources are correlated one-dimensionally along the lines  
235 within the length of the total network. For more detailed considerations of uncertainty  
236 grid-maps we refer to Andres et al. (2016)(Andres et al., 2016). The total estimate  
237 data was from EDGARv4.3.2\_FT2016. The annual spatial data of EDGARv4.3.2

238 used in this study was from 2000 to 2012 with a resolution at  $0.1 \times 0.1$  degree.

### 239 **3. PKU-CO<sub>2</sub>**

240 The PKU-CO<sub>2</sub> data set was constructed for 64 fuel sub-types in 5 categories and  
241 6 sectors, in addition to cement production(Wang, 2013). Due to differences in data  
242 sources and data processing methods, the 64 fuel sub-types were classified into 8  
243 groups, namely (1) wildfires, (2) aviation/shipping, (3) power stations, (4) natural gas  
244 flaring, (5) agricultural solid wastes, (6) non-organized waste incineration, (7) dung  
245 cakes, and (8) others. County-level fuel consumptions in China were determined  
246 based on the provincial fuel consumption(NBS, 2008) and a set of  
247 provincial-data-based regression models(Zhang et al., 2007).

248 Based on PKU-FUEL data, CO<sub>2</sub> emissions were calculated using CO<sub>2</sub> emission  
249 factors (EFC) and the combustion rates for different fuel types. EFC for all  
250 combustion processes were derived as the means of data collected from the literature.  
251 Specially, EFC for oil consumed in petroleum refinery industry was from Nyboer et al.  
252 (2006)(Nyboer, 2006), and EFC for oil consumed by 7 ship types and 5 types of  
253 biomass burning were collected from Wang et al. (2008)(Wang, 2008) and van der  
254 Werf et al. (2010)(van der Werf, 2010). For the remaining fuel types, EFC were  
255 collected from URS (2003)(URS, 2003), IPCC (1996)(IPCC, 1996), US Department  
256 of Energy (2000)(Energy, 2000), API (2001)((API), 2001), and US EPA  
257 (2008)((USEPA), 2008). Fixed combusted rates of 0.990, 0.980, 0.995, 0.980,  
258 0.901,0.887, 0.789, 0.919, and 0.901 were applied to petroleum, coal, natural gas,

259 solid municipal and industrial waste fuel, biomass burned in the field, firewood  
260 burned in cook stoves, firewood burned in fireplaces, crop residue burned in cook  
261 stoves, and open burning of agriculture waste, respectively(Lee, 2005;Johnson,  
262 2008;Oda, 2011;Zhang, 2008). CO<sub>2</sub> emissions from cement production were also  
263 compiled. These are based on cement production data in 155 countries (USGS,  
264 2010)((USGS), 2010) and CO<sub>2</sub> emission factors from the literature(Andres, 1996).  
265 Country-level reported CO<sub>2</sub> emissions from cement production were disaggregated to  
266 0.1 °×0.1 °grids using the industrial coal consumption map from PKU-FUEL as a  
267 proxy, hence making the assumption that cement manufactures are co-located with  
268 coal consumption.

269 Accuracy of the location of the power plants were examined(Wang, 2013). The  
270 locations for 100 randomly selected power plants for China were checked one by one  
271 in Google imagery. It was found that 45 % of the stations are located in the same grid  
272 points (0.1 °×0.1 °) as reported in the CARMA v2.0 database, and that the remaining  
273 42% stations are actually located in grids adjacent to the one listed in CARMA v2.0.  
274 This suggests that the accuracy of the CARMA v2.0 power plant spatial localization  
275 errors in China are relatively large for 0.1 °×0.1 ° resolution mapping. Thus, the  
276 authors suggest that location of power plants is expected to be updated when an  
277 improved version of CARMA product is available. The monthly PKU-CO<sub>2</sub>-v2  
278 inventory data was used for evaluation over the periods 2000—2014.

#### 279 4. CHRED-China High Resolution Emission Database

280 The CHRED CO<sub>2</sub> data covers emissions from energy combustion, industrial  
281 processes, transportation, agriculture, households and services. Details about the  
282 emission estimation and spatial disaggregation methods can refer to previous  
283 work(Cai et al., 2012;Wang et al., 2014;Cai et al., 2016a;Cai et al., 2016b;Cai and  
284 Zhang, 2014). The CHRED uses a bottom-up method to calculate total emissions  
285 which is based on the data of each individual enterprise. Emissions from  
286 transportation, agriculture, and services are estimated based on proxy data.  
287 Specifically, emissions from the transport are calculated based on provincial data for  
288 energy consumption of the transport sector(Cai et al., 2012). We spatialized the total  
289 transport emissions using two datasets: 1) data for the national road network, railway  
290 network, navigation network, and air-port locations; 2) and traffic flows of these  
291 networks. We disaggregated provincial agricultural emissions to each grid based on  
292 farmland spatial distribution at the 30 m × 30 m spatial resolution. Moreover, we  
293 disaggregated emissions from services at the province level to each grid based on  
294 spatial distribution of built-up areas. CHRED contains a core account and an  
295 extension account. The core account contains emissions by industries, and the  
296 extended account contains socioeconomic data (e.g., land uses, population, and  
297 human activity data) which are supplemental to emission data.

298 The total emission for year 2007 was summed from the gridded data. The spatial  
299 data of year 2012 used in this study was rescaled from the 2007 emissions provided  
300 by Cai et al., (2018)(Cai et al., 2018) by a factor according to the CO<sub>2</sub> emission

301 inventory in 2012 from NCCC.

## 302 **5. MEIC-Multi-resolution Emission Inventory for China**

### 303 **Overview**

304 The Multi-resolution Emission Inventory for China (MEIC) is a bottom-up  
305 emission inventory framework developed and maintained by Tsinghua University,  
306 which uses a technology-based methodology to calculate air pollutant and  
307 CO<sub>2</sub> emissions for more than 700 anthropogenic sources for China from 1990 to the  
308 present. With the detailed source classification, the MEIC model can represent  
309 emission characteristics from different sectors, fuels, products, combustion/process  
310 technologies, and emission control technologies. The MEIC model improved the  
311 bottom-up emission inventories developed by the same group(Zhang, 2009), with  
312 major improvements of a unit-based power plant emission database(Liu, 2015), a  
313 high-resolution vehicle emission modeling approach(Zheng, 2014), an explicit  
314 NMVOC speciation assignment methodology(Li, 2014), and a unified, online  
315 framework for emission calculation, process, and download (available at  
316 <http://www.meicmodel.org>). In this study, we used the most updated version of MEIC  
317 1.3(Zheng, 2018), and derived emissions data between the years 2000 and 2016.

### 318 **Emission calculations**

319 The MEIC model calculates CO<sub>2</sub> emissions for 31 provinces in mainland China  
320 using the technology-based method as follows:



321 
$$Emis_{i,j} = A_{i,j} \times \sum_m (X_{i,j,m} \times EF_{i,j,m})$$

322 Where  $i$  represents the province,  $j$  represents the emission source,  $m$  represents  
323 the technologies for manufacturing,  $A$  is the activity rate,  $X$  is the fraction of a specific  
324 manufacturing technology,  $EF$  is the CO<sub>2</sub> emission factor. The details of the  
325 technology-based approach can be found in Zhang et al. (2007, 2009)(Zhang, 2007,  
326 2009), Lei et al. (2011)(Lei et al., 2011), and Li et al. (2017)(Li, 2017).

327 Emissions from power plants and on-road vehicles are calculated using more  
328 detailed methods that can achieve high spatial resolutions in emissions mapping. The  
329 unit-based method is developed to track emissions for each coal-fired power plant  
330 based on unit-specific parameters, including boiler type, fuel consumption, fuel  
331 quality, and electricity generation(Liu, 2015). Emissions from on-road vehicles are  
332 estimated using a county-level database developed by Zheng et al. (2014)(Zheng,  
333 2014), which resolves the spatial distribution of vehicle ownership in each county as  
334 well as the vehicle kilometers traveled on different types of roads. Detailed  
335 documentation of the method and data for power plants and on-road vehicles can be  
336 found in Liu et al. (2015)(Liu, 2015) and Zheng et al. (2014)(Zheng, 2014),  
337 respectively.

### 338 **Definitions of source sectors**

339 The MEIC model covers more than 700 anthropogenic sources in China,  
340 including all the combustion sources and industrial processes that generate CO<sub>2</sub>  
341 emissions. For example, the MEIC calculates CO<sub>2</sub> emissions from the combustion of

342 coal, oil, and natural gas used in stationary (i.e., industrial and residential facilities)  
 343 and mobile (i.e., on-road and off-road) sources, as well as from the industrial  
 344 processes of cement and lime production. All the detailed anthropogenic sources that  
 345 emit CO<sub>2</sub> are classified into several sub-sectors and finally grouped into four source  
 346 sectors used in the analysis of this study. The four sectors are power, industry,  
 347 residential, and transportation, and their relations with IPCC source codes are as  
 348 follows.

349 Table. The MEIC source sectors and IPCC codes

| MEIC sub-sector          | MEIC sector        | IPCC codes         |
|--------------------------|--------------------|--------------------|
| power                    | power              | 1A1a               |
| industrial heating       | industry           | 1A1bc              |
| residential heating      | residential        | 1A1bc              |
| industrial boiler        | industry           | 1A2                |
| residential combustion   | residential        | 1A4                |
| iron and steel           | industry           | 1A2, 2C            |
| cement                   | industry           | 1A2, 2A            |
| other industrial process | industry           | 2A, 2B, 2C, 2D, 1B |
| on-road vehicles         | transportati<br>on | 1A3b               |
| motorcycles              | transportati<br>on | 1A3b               |

---

|          |                    |                  |
|----------|--------------------|------------------|
| off-road | transportati<br>on | 1A3c, 1A3d, 1A3e |
|----------|--------------------|------------------|

---

350 **Emission factors and Activity data**

351 Activity rates of energy consumptions by fuel type, by sector, and by province  
352 are derived from China Energy Statistical Yearbook. The production of cement and  
353 lime in each province are achieved from China Statistical Yearbook. For the coal-fired  
354 power plants, we derive the unit-level activity data from the unpublished database  
355 owned by the Ministry of Ecology and Environment. These data are collected from  
356 each plant by local agencies, and then managed and verified by Ministry of Ecology  
357 and Environment. Emission factors of CO<sub>2</sub> in MEIC are based on Liu et al.  
358 (2015)(Liu et al., 2015).

359 **Spatial modelling of emissions**

360 The spatial modelling of emissions in MEIC is conducted for the point, nonpoint,  
361 and mobile sources, respectively. The point sources (i.e., coal-fired power plants) in  
362 MEIC have accurate geographical coordinates, which are visually checked using the  
363 Google Map and are used to locate the emissions for each point source. The nonpoint  
364 sources emissions are first estimated at the provincial level and then spatially  
365 allocated to each county and 30"×30" grid cells according to spatial proxies such as  
366 urban or rural extents(Schneider, 2009) and population distributions((ORNL), 2013).  
367 The mobile source (i.e., on-road vehicles) emissions are estimated at the county level

368 and allocated to grid cells according to the road map. The spatial modelling methods  
 369 uses in MEIC are summarized in the following table. The 30"×30" emissions map of  
 370 MEIC are finally aggregated to 0.25×0.25 degrees when the data product published,  
 371 because a finer resolution could induce large uncertainties due to the nonlinear  
 372 relationship between emissions and spatial proxies(Zheng, 2017).

373 Table. Spatial modelling methods and proxies used in MEIC.

| <b>Sector</b>         | <b>Source</b>              | <b>Province to<br/>county</b>              | <b>County to<br/>grid</b> |
|-----------------------|----------------------------|--------------------------------------------|---------------------------|
| <b>Power</b>          | Coal-fired power<br>plants | Point source (geographical<br>coordinates) |                           |
|                       | Other power plants         | Industrial<br>GDP                          | Urban<br>population       |
| <b>Industry</b>       | All                        | Industrial<br>GDP                          | Urban<br>population       |
| <b>Residential</b>    | Urban                      | Urban<br>population                        | Urban<br>population       |
|                       | Rural                      | Rural<br>population                        | Rural<br>population       |
| <b>Transportation</b> | On-road                    | /                                          | Road<br>network           |
|                       | Motorcycle                 | Vehicle<br>numbers                         | Road<br>network           |

|                            |                     |                     |
|----------------------------|---------------------|---------------------|
| Off-road:<br>agriculture   | Machine<br>power    | Rural<br>population |
| Off-road:<br>construction  | Total GDP           | Urban<br>population |
| Off-road: other<br>sources | Total<br>population | Total<br>population |

---

374

375 In this study, we used the MEIC data from the latest version 1.3 excluding  
376 biofuel emissions specially prepared by Bo Zheng(Zheng et al., 2018) to increase  
377 comparability, and derived the 2000-2016 monthly CO<sub>2</sub> emissions from power,  
378 industry, residential, and transportation sectors at the spatial resolution of 0.25 × 0.25  
379 degree.

## 380 **6. NJU-CO<sub>2</sub>**

381 The Intergovernmental Panel on Climate Change (IPCC) sectoral approach  
382 (IPCC, 2006) was used to develop NJU-CO<sub>2</sub> emission inventories for 31 provinces in  
383 China (excluding Hong Kong, Macao and Taiwan) from 2000 to 2016. Total fossil  
384 fuel consumption data were calculated from a production perspective based on final  
385 energy consumption, plus energy used for transformation minus non-energy use.  
386 Emissions from fossil fuel consumption were further divided into three sub-sectors of  
387 industrial energy consumption (IEC), transportation energy consumption (TEC) and  
388 other energy consumption (OEC). Emissions from fossil fuel use for international

389 bunker were not calculated here. Emissions from industrial processes (INP) referred  
390 to direct CO<sub>2</sub> emissions from chemical or physical transformation of materials during  
391 non-combustion industrial production (e.g., cement, steel, etc.) processes(Wang,  
392 2012). Data on energy consumption for the whole of society and for each sector in  
393 provinces were derived from provincial energy balance tables in the China Energy  
394 Statistical Yearbook, with exception of transportation fuel consumption. For Tibet,  
395 CO<sub>2</sub> emissions from IEC and OEC have not been calculated due to data shortage. Fuel  
396 use by road transportation was calculated as the product of vehicle mileage traveled  
397 and the relevant fuel economy. Data on vehicle populations were taken from the  
398 statistical yearbooks(NBS, 2008, 2016) for each province. Vehicle mileage traveled  
399 (VMT) and fuel economy (FE) data were taken from previous studies(Wang, 2010,  
400 2011). Industrial products were taken from the statistical yearbooks for each province  
401 and the China Cement Yearbook. The authors substituted cement production with  
402 clinker production in order to calculate CO<sub>2</sub> emissions from the cement industrial  
403 process. Activity data (AD), such as energy consumption and industrial production,  
404 are primarily from two sources: China's provincial statistics and national statistics,  
405 which do not match well. A triangular distribution function is assumed for AD data for  
406 limited samples(Brinkman, 2005;Wu, 2010). The national data point was set as the  
407 minimum value, and then the maximum value was calculated by adding up the  
408 provincial AD data and absolute difference between provincial and national statistics.

409 As power plants accounted for nearly 30 % of China's total emissions(Zhao,  
410 2012) and cement production accounted for 60 % of emissions from INP, we mapped

411 those emissions as large point sources (LPS) and identify their locations exactly by  
412 latitude and longitude. Power plants ranking in the top 80 % in terms of electricity  
413 production(CEC, 2014, 2015) and cement plants with capacity above  $1 \text{ Mt yr}^{-1}$  were  
414 selected as LPS in this study. We derived the geographical coordinate of LPS by  
415 checking their addresses with Google Earth. Some LPS that could not be identified for  
416 lack of information were included in area emissions. The emissions from other  
417 sources (except LPS) were treated as area emission and allocated to each grid at  $0.25^\circ$   
418 resolution via the proxies of population and/or GDP (gross domestic product). The 1  
419 km $\times$ 1 km gridded data of China's population and GDP densities(Liu, 2005;Yang et al.,  
420 2009) from 2000 to 2009 were developed and applied. Here we used the most up to  
421 date NJU-CO<sub>2</sub> version 2017 provided by data developer.

## 422 **7. CEADs-China Emission Accounts and Datasets**

423 CEADs provides time-series multi-scale CO<sub>2</sub> emission inventories for China, its  
424 provinces and cities. The national and provincial level emission inventories from 1997  
425 to 2015 can be collected from the CEADs website(CEADs) or Figshare(Shan Y,  
426 2018a). The inventory for 182 Chinese cities in 2010 can be collected in the same way  
427 as well(Shan Y, 2018b;Shan et al., 2018a).

428 CEADs CO<sub>2</sub> emissions were estimated with the IPCC administrative  
429 territorial-based scope which do not include emissions from international aviation and  
430 shipping(Barrett J, 2013). The CO<sub>2</sub> emissions include both fossil fuel- and  
431 process-related (cement) emissions. The emissions related to electricity and heat

432 consumption are not considered as these parts belong to scope 2 indirect emissions.  
433 The emissions induced by electricity and heat generation are allocated to the power  
434 sectors instead. Meanwhile, the fossil fuel used as industrial materials (known as  
435 non-energy use) are excluded from the total consumption as well.

436 CEADs provides two approaches of fossil fuel consumption and CO<sub>2</sub> emissions:  
437 the sectoral approach and reference approach. The sectoral approach is calculated  
438 from the consumption perspective of fossil fuel, while the reference approach is  
439 calculated from the production side of three primary fuels. The sectoral emission  
440 inventories are constructed as 47 socioeconomic sectors, 17 fossil fuels, and the  
441 industrial process emissions.

442 The CO<sub>2</sub> emissions are calculated by Mass Balance Theory, they equal to activity  
443 data (fossil fuel consumption or industrial production) timed by emission factors. The  
444 fossil fuel consumption is collected based on Energy Balance Table (for national and  
445 provincial level). Restricted by the data quality at the city level, CEADs develops a  
446 series of methods to estimate the city level Energy Balance Table (Shan Y, 2017). In  
447 this way, the city level emission inventories are designed in the same way with the  
448 national and provincial inventories, making them consistent and comparable. Then the  
449 CEADs adopts the “crowd-sourcing” working mode to compile and verify the city  
450 level emission inventories. Emission factors used by CEADs datasets are collected  
451 from Liu, Guan’s previous studies (Liu et al., 2015) on China’s energy qualities. The  
452 factors are measured based on a wide survey of over 4000 coal mines in China, and  
453 are assumed to be more accurate than the IPCC default value. The factors are adopted



454 by the Chinese governments in its third National Communications on Climate  
455 Change(NDRC, 2016).

456 Detailed information about CEADs emission inventories and their calculation  
457 methods can be found at Shan, Guan(Shan et al., 2018b). The annual CEADs at both  
458 national and provincial level emissions from 2000 to 2015 were used in the present  
459 study.

460

461

## 462 8. References

- 463 (API), A. P. I.: Compendium of Greenhouse Gas Emissions Estimation Methodologies for the Oil and  
464 Gas Industry, Pilot Test Version, available at:  
465 [http://www.api.org/environment-health-and-safety/climate-change/whats-new/compendium-ghg-me-](http://www.api.org/environment-health-and-safety/climate-change/whats-new/compendium-ghg-methodologies-oil-and-gas-industry)  
466 [thodologies-oil-and-gas-industry](http://www.api.org/environment-health-and-safety/climate-change/whats-new/compendium-ghg-methodologies-oil-and-gas-industry), in, 2001.
- 467 (ORNL), O. R. N. L.: LandScan Global Population Database, Oak Ridge National Laboratory, Oak Ridge,  
468 TN, USA, in, 2013.
- 469 (USEPA), U. S. E. P. A.: Emission factor documentation for AP-42, available  
470 at:<http://www.epa.gov/ttn/chief/ap42/index.html>, 2008.
- 471 (USGS), U. S. G. S.: Cement Statistics and Information 2007, available at:  
472 <http://minerals.usgs.gov/minerals/pubs/commodity/cement/>, in, 2010.
- 473 Andres, R. J., Boden, T. A., and Higdon, D.: A new evaluation of the uncertainty associated with CDIAC  
474 estimates of fossil fuel carbon dioxide emission, *Tellus B: Chemical and Physical Meteorology*, 66,  
475 23616, 10.3402/tellusb.v66.23616, 2014.
- 476 Andres, R. J., Boden, T. A., and Higdon, D. M.: Gridded uncertainty in fossil fuel carbon dioxide  
477 emission maps, a CDIAC example, *Atmospheric Chemistry & Physics*, 16, 1-56, 2016.
- 478 Andres, R. J., Marland, G., Fung, I. E., and Matthews, E. A.:  $1^{\circ} \times 1^{\circ}$  distribution of carbon dioxide  
479 emissions from fossil fuel consumption and cement manufacture, 1950-1990, *Global Bio-geochem. Cy.*,  
480 10, 419–429, 1996.
- 481 association, W. c.: Spatial proxies for the coal mining activities,  
482 <http://www.worldcoal.org/coal/coal-mining/>, in, 2016.
- 483 Barrett J, P. G., Wiedmann T, Scott K, Lenzen M, Roelich K, et al. : Consumption-based GHG emission  
484 accounting: a UK case study, *Climate Policy*, 13, 451-470, 2013.
- 485 Boden, T. A., Marland, G., and Andres, R. J.: Global, Regional, and National Fossil-Fuel CO<sub>2</sub> Emissions,  
486 Carbon Dioxide Information Analysis Center, Oak Ridge National Laboratory, U.S. Department of  
487 Energy, Oak Ridge, Tenn., USA, [https://doi.org/10.3334/CDIAC/00001\\_V2016](https://doi.org/10.3334/CDIAC/00001_V2016), in, 2016.
- 488 BP: BP Statistical Review of World Energy June 2016, in,  
489 <http://oilproduction.net/files/especial-BP/bp-statistical-review-of-world-energy-2016-full-report.pdf>  
490 (last access: June 2018), 2016.
- 491 Brinkman, N., Wang, M., Weber, T., and Darlington, T.: Well-to-wheels analysis of advanced  
492 fuel/vehicle systems – a North American study of energy use, greenhouse gas emissions, and criteria  
493 pollutant emissions, Argonne Natl. Lab, Argonne, IL, USA 2005.
- 494 Cai, B., Yang, W., Cao, D., Liu, L., Zhou, Y., and Zhang, Z.: Estimates of China's national and regional  
495 transport sector CO<sub>2</sub> emissions in 2007, *Energy Policy*, 41, 474-483, 2012.
- 496 Cai, B., and Zhang, L.: Urban CO<sub>2</sub> emissions in China: Spatial boundary and performance comparison,  
497 *Energy Policy*, 66, 557-567, 2014.
- 498 Cai, B., Wang, J., Jie, H., and Yong, G.: Evaluating CO<sub>2</sub> emission performance in China's cement  
499 industry: An enterprise perspective, *Applied Energy*, 166, 191-200, 2016a.
- 500 Cai, B., Xin, B., Zhang, L., Boyce, J. K., Zhang, Y., and Yu, L.: Gearing carbon trading towards  
501 environmental co-benefits in China: Measurement model and policy implications, *Global*  
502 *Environmental Change*, 39, 275-284, 2016b.

503 Cai, B., Liang, S., Zhou, J., Wang, J., Cao, L., Qu, S., Xu, M., and Yang, Z.: China high resolution emission  
504 database (CHRED) with point emission sources, gridded emission data, and supplementary  
505 socioeconomic data, Resources, Conservation and Recycling, 129, 232-239,  
506 <https://doi.org/10.1016/j.resconrec.2017.10.036>, 2018.

507 CARMAv3.0: Carbon Monitoring for Action : power plants: data, version v3.0 <http://carma.org/plant>,  
508 2012.

509 CEADs: CO2 emissions of China and its provinces.<http://www.ceads.net/>, in.  
510 CEC: Commission for Environmental Cooperation, <http://takingstock.cec.org>, in, 2014, 2015.

511 Chengfeng, W., Corbett, J. J., and Jeremy, F.: Improving spatial representation of global ship emissions  
512 inventories, Environmental Science & Technology, 42, 193-199, 2008.

513 CIESIN: Center for International Earth Science Information Network - CIESIN - Columbia University,  
514 United Nations Food + Agriculture Programme - FAO, and Centro Internacional de Agricultura Tropical  
515 - CIAT: Gridded Population of the World, Version 3 (GPWv3): Population Count Grid, Future Estimates,  
516 in, NASA Socioeconomic Data and Applications Center (SEDAC), Palisades, NY, 2005.

517 Elvidge, C. D., Ziskin, D., Baugh, K. E., Tuttle, B. T., Ghosh, T., Pack, D. W., Erwin, E. H., and Zhizhin, M.: A  
518 Fifteen Year Record of Global Natural Gas Flaring Derived from Satellite Data, Energies, 2, 595, 2009.

519 Energy, U. D. o.: Instructions for Form EIA 1605 Voluntary Reporting of Greenhouse Gases, Appendix  
520 B – Fuel and Energy Source Codes and Emission Coefficients, available at:  
521 <http://www.eia.gov/oiaf/1605/reportingformprelaunch.html>(last access: 14 August 2012), in, 2000.

522 Eurogas: Eurogas statistical report, Eurogas.org NPO,  
523 [http://www.eurogas.org/uploads/media/Statistics\\_2010\\_29.11.10.pdf](http://www.eurogas.org/uploads/media/Statistics_2010_29.11.10.pdf), in, 2010.

524 FAOSTAT: Statistics Division of the Food and Agricultural Organisation of the UN. Live animal numbers,  
525 crop production, total nitrogen fertiliser consumption statistics till 2012, in, 2014.

526 Geofabrik: Openstreetmap, <https://www.openstreetmap.org> and OpenRailwayMap, 2015.

527 International Civil Aviation Organisation data: Airline Route Mapper data,  
528 <http://arm.64hosts.com/>, 2015.

529 IEA: Energy Balances of OECD and non-OECD countries, International Energy Agency, Paris, Beyond  
530 2020 Online Database, in, 2014.

531 IFA: (International Fertilizer Industry Organization): Historical production, trade and  
532 consumption statistics. Internet: [http://www.fertilizer.org/En/Statistics/PIT\\_Excel\\_Files.aspx](http://www.fertilizer.org/En/Statistics/PIT_Excel_Files.aspx),  
533 2015.

534 IPCC: Revised 1996 IPCC Guidelines for National Greenhouse Gas Inventories, Reference Manual  
535 (Volume 3), United Nations Environment Programme, the Organization for Economic Co-operation  
536 and Development, the International Energy Agency, IPCC, available  
537 at:<http://www.ipcc-nggip.iges.or.jp/public/gl/invs1.htm>, 1996.

538 IPCC: IPCC Guidelines for National Greenhouse Gas Inventories. Eggleston, S., Buendia, L., Miwa, K.,  
539 Ngara, T., Tanabe, K. (eds.). , IPCC-TSU NGGIP, IGES, Hayama, Japan.  
540 [www.ipcc-nggip.iges.or.jp/public/2006gl/index.html](http://www.ipcc-nggip.iges.or.jp/public/2006gl/index.html), 2006.

541 Janssens-Maenhout, G., Crippa, M., Guizzardi, D., Muntean, M., Schaaf, E., Dentener, F., Bergamaschi,  
542 P., Pagliari, V., Olivier, J. G. J., Peters, J. A. H. W., van Aardenne, J. A., Monni, S., Doering, U., and  
543 Petrescu, A. M. R.: EDGAR v4.3.2 Global Atlas of the three major Greenhouse Gas Emissions for the  
544 period 1970–2012, Earth Syst. Sci. Data Discuss., <https://doi.org/10.5194/essd-2017-5179>, 2017.

545 Janssens-Maenhout, G., Pagliari, V., Guizzardi, D., Muntean, M.: Global emission inventories in the  
546 Emission Database for Global Atmospheric Research (EDGAR) – Manual (I): Gridding: EDGAR

547 emissions distribution on global grid-maps, JRC Report, EUR 25785 EN, ISBN 978 - 92 - 79 - 28283 - 6,  
548 doi.10.2788/81454, 82013, 2013.

549 Johnson, M., Edwards, R., Frenk, C. A., and Masera, O.: In-field greenhouse gas emissions from  
550 cookstoves in rural Mexican households, *Atmos. Environ.*, 42, 1206–1222, 2008.

551 Le Quéré, C., Andrew, R. M., Friedlingstein, P., Sitch, S., Pongratz, J., Manning, A. C., Korsbakken, J. I.,  
552 Peters, G. P., Canadell, J. G., Jackson, R. B., Boden, T. A., Tans, P. P., Andrews, O. D., Arora, V. K., Bakker,  
553 D. C. E., Barbero, L., Becker, M., Betts, R. A., Bopp, L., Chevallier, F., Chini, L. P., Ciais, P., Cosca, C. E.,  
554 Cross, J., Currie, K., Gasser, T., Harris, I., Hauck, J., Haverd, V., Houghton, R. A., Hunt, C. W., Hurtt, G.,  
555 Ilyina, T., Jain, A. K., Kato, E., Kautz, M., Keeling, R. F., Klein Goldewijk, K., Körtzinger, A., Landschützer,  
556 P., Lefèvre, N., Lenton, A., Lienert, S., Lima, I., Lombardozzi, D., Metzl, N., Millero, F., Monteiro, P. M. S.,  
557 Munro, D. R., Nabel, J. E. M. S., Nakaoka, S.-I., Nojiri, Y., Padin, X. A., Peregon, A., Pfeil, B., Pierrot, D.,  
558 Poulter, B., Rehder, G., Reimer, J., Rödenbeck, C., Schwinger, J., Séférian, R., Skjelvan, I., Stocker, B. D.,  
559 Tian, H., Tilbrook, B., Tubiello, F. N., van der Laan-Luijkx, I. T., van der Werf, G. R., van Heuven, S., Viovy,  
560 N., Vuichard, N., Walker, A. P., Watson, A. J., Wiltshire, A. J., Zaehle, S., and Zhu, D.: Global Carbon  
561 Budget 2017, *Earth Syst. Sci. Data*, 10, 405-448, <https://doi.org/410.5194/essd-5110-5405-2018>, 2018.

562 Lee, S., Baumann, K., Schauer, J. J., Sheesley, R. J., Naeher, L.P., Meinardi, S., Blake, D. R., Edgerton, E. S.,  
563 Russell, A. G., and Clements, M.: Gaseous and particulate emissions from pre-scribed burning in  
564 Georgia, *Environ. Sci. Technol.*, 39, 9049–9056, 2005.

565 Lehner, B., Liermann, C. R., Revenga, C., Vörösmarty, C., Fekete, B., Crouzet, P., Döll, P., Endejan, M.,  
566 Frenken, K., and Magome, J.: High-resolution mapping of the world's reservoirs and dams for  
567 sustainable river-flow management, *Frontiers in Ecology & the Environment*, 9, 494-502, 2011.

568 Lei, Y., Zhang, Q., Nielsen, C., and He, K.: An inventory of primary air pollutants and CO<sub>2</sub> emissions  
569 from cement production in China, 1990–2020, *Atmospheric Environment*, 45, 147-154,  
570 <https://doi.org/10.1016/j.atmosenv.2010.09.034>, 2011.

571 Li, M., Zhang, Q., Kurokawa, J.-I., Woo, J.-H., He, K., Lu, Z., Ohara, T., Song, Y., Streets, D. G., Carmichael,  
572 G. R., Cheng, Y., Hong, C., Huo, H., Jiang, X., Kang, S., Liu, F., Su, H., and Zheng, B.: MIX: a mosaic Asian  
573 anthropogenic emission inventory under the international collaboration framework of the MICS-Asia  
574 and HTAP, *Atmos. Chem. Phys.*, 17, 2017.

575 Li, M., Zhang, Q., Streets, D. G., He, K. B., Cheng, Y. F., Emmons, L. K., Huo, H., Kang, S. C., Lu, Z., Shao,  
576 M., Su, H., Yu, X., and Zhang, Y.: Mapping Asian anthropogenic emissions of non-methane volatile  
577 organic compounds to multiple chemical mechanisms, *Atmos. Chem. Phys.*, 14, 5617-5638,  
578 <https://doi.org/5610.5194/acp-5614-5617-2014>, 2014.

579 Liu, F., Zhang, Q., Tong, D., Zheng, B., Li, M., Huo, H., and He, K. B.: High-resolution inventory of  
580 technologies, activities, and emissions of coal-fired power plants in China from 1990 to 2010, *Atmos.*  
581 *Chem. Phys.*, 15, 13299-13317, 2015.

582 Liu, H., Jiang, D., Yang, X., and Luo, C.: 1 km gridded GDP database of China based on GIS, *Geo-Inf. Sci.*,  
583 7, 120–123, 2005.

584 Liu, Z., Guan, D., Wei, W., Davis, S. J., Ciais, P., Bai, J., Peng, S., Zhang, Q., Hubacek, K., Marland, G.,  
585 Andres, R. J., Crawford-Brown, D., Lin, J., Zhao, H., Hong, C., Boden, T. A., Feng, K., Peters, G. P., Xi, F.,  
586 Liu, J., Li, Y., Zhao, Y., Zeng, N., and He, K.: Reduced carbon emission estimates from fossil fuel  
587 combustion and cement production in China, *Nature*, 524, 335, [10.1038/nature14677](https://doi.org/10.1038/nature14677)  
588 <https://www.nature.com/articles/nature14677#supplementary-information>, 2015.

589 Marcogaz: Technical statistics 01-01-2013, technical sheet of Marcogaz technical association of the  
590 European natural gas industry, [Technical\\_statistics\\_01-01-2013\\_revisi\\_](#)

591 on\_15-09-2014\_-\_WEB\_VERSION.pdf, in, 2013.

592 Marland, G., and Rotty, R. M.: Carbon dioxide emissions from fossil fuels: a procedure for estimation  
593 and results for 1950&ndash;1982, *Tellus Series B-Chemical & Physical Meteorology*, 36B, 232-261,  
594 1984.

595 NBS, N. B. o. S.: *China Energy Statistical Yearbook 2007*, China Statistics Press, Beijing, 2008.

596 NBS, N. B. o. S.: *China Energy Statistical Yearbook 2016*, China Statistics Press, Beijing, 2016.

597 NBS, N. B. o. S.: *China Energy Statistical Yearbook 2018*, China Statistics Press, Beijing, 2018.

598 NDRC: *The People's Republic of China First Biennial Update Report on Climate Change*,  
599 <http://ghs.ndrc.gov.cn/dtjj/201701/W020170123346264208002.pdf>, 2016.

600 Nyboer, J., Strickland, C., and Tu, J. J.: Improved CO<sub>2</sub>, CH<sub>4</sub> and N<sub>2</sub>O Emission Factors for  
601 Producer-Consumed Fuels in Oil Refinerie, Canadian Industrial End-use Energy Data and Analysis  
602 Centre, in, 2006.

603 Oda, T., Maksyutov, S., and Andres, R. J.: The Open-source Data Inventory for Anthropogenic CO<sub>2</sub>,  
604 version 2016 (ODIAC2016): a global monthly fossil fuel CO<sub>2</sub> gridded emissions data product for tracer  
605 transport simulations and surface flux inversions, *Earth Syst. Sci. Data*, 10, 87-107,  
606 <https://doi.org/10.5194/essd-5110-5187-2018>, 2018.

607 Oda, T., Maksyutov, S., and Elvidge, C. D.: Disaggregation of national fossil fuel CO<sub>2</sub> emissions using a  
608 global power plant database and DMSP nightlight data, *Proc. of the 30th Asia-Pacific Advanced  
609 Network Meeting*, 220–229, 2010.

610 Oda, T. a. M., S.: A very high-resolution (1 km×1 km) global fossil fuel CO<sub>2</sub> emission inventory derived  
611 using a point source database and satellite observations of nighttime lights, *Atmos. Chem. Phys.*, 11,  
612 543-556, <https://doi.org/510.5194/acp-5111-5543-2011>, 2011.

613 Olivier, J. G. J., Janssens-Maenhout, G., Muntean, M., and Peters, J. A. H. W.: Trends in global CO<sub>2</sub>  
614 emissions: 2015 report, JRC 98184, 2015.

615 Olivier, J. G. J., Bouwman, A.F., V an der Maas, C.W.M., Berdowski , J.J.M., Veldt, C., Bloos, J.P.J.,  
616 Visschedijk, A.J.H., Zandveld, P.Y.J., Haverslag, J.L.: Description of EDGAR Version 2.0:  
617 A set of global emission inventories of greenhouse gases and ozone depleting substances for  
618 all anthropogenic and most natural sources on a per country basis and on 1 ° x1 ° grid. , in: RIVM  
619 Techn. Report nr. 771060002, TNO-MEP report nr. R96 /119. Nat. Inst. Of Public Health and the  
620 Environment/ Netherlands Organisation for Applied Scientific Research, Bilthoven, 1996.

621 Petrescu, A. M. R., Abad-Viñas, R., Janssens-Maenhout, G., Blujdea, V. N. B., and Grassi, G.: Global  
622 estimates of carbon stock changes in living forest biomass: EDGARv4.3 – time series from 1990 to  
623 2010, *Biogeosciences*, 9, 3437-3447, <https://doi.org/3410.5194/bg-3439-3437-2012>, 2012.

624 Schneider, A., Friedl, M. A., and Potere, D.: A new map of global urban extent from MODIS satellite  
625 data, *Environ. Res. Lett.*, 4, 044003, doi:044010.041088/041748-049326/044004/044004/044003,  
626 2009.

627 Shan, Y., Guan, D., Hubacek, K., Zheng, B., Davis, S. J., Jia, L., Liu, J., Liu, Z., Fromer, N., and Mi, Z.:  
628 City-level climate change mitigation in China, *Sci Adv*, 4, eaaq0390, 2018a.

629 Shan, Y., Guan, D., Zheng, H., Ou, J., Li, Y., Meng, J., Mi, Z., Liu, Z., and Zhang, Q.: China CO<sub>2</sub> emission  
630 accounts 1997-2015, *Scientific Data*, 5, 170201, 2018b.

631 Shan Y, G. D., Liu J, Mi Z, Liu Z, Liu J, et al.: Methodology and applications of city level CO<sub>2</sub> emission  
632 accounts in China, *Journal of Cleaner Production*, 161, 1215-1225, 2017.

633 Shan Y, G. D., Zheng H, Meng J, Mi Z, Liu Z. : China CO<sub>2</sub> emission accounts 1997-2015. In: Figshare,  
634 editor. Collection2018, 2018a.

635 Shan Y, L. J., Liu Z, Guan D. : China city-level socioeconomic inventory. In: Figshare, editor.2018, 2018b.

636 Tomohiro Oda, S. M.: ODIAC Fossil Fuel CO<sub>2</sub> Emissions Dataset (ODIAC2017), Center for Global  
637 Environmental Research, National Institute for Environmental Studies, DOI:10.17595/20170411.001.,  
638 in, 2015.

639 UNFCCC: National Inventory Report, submissions of the greenhouse gas inventories for Annex I  
640 countries.

641 [http://unfccc.int/national\\_reports/annex\\_i\\_ghg\\_inventories/national\\_inventories\\_submissions/items/  
642 7383.php](http://unfccc.int/national_reports/annex_i_ghg_inventories/national_inventories_submissions/items/7383.php), in, 2014.

643 URS: Corporation EME Greenhouse Gas Emission Factor Review– Final Technical Memorandum, Austin,  
644 Texas, in, 2003.

645 USDA: Biofuel Annuals. GAIN Reports for Argentina, Brazil (Sugar Annual), China,  
646 India, Indonesia, Malaysia, Peru, Philippines and Thailand. US Department of Agriculture, in, 2014.

647 USGS: US Geological Survey Minerals Yearbook, US Geological Survey, Reston,  
648 Virginia, 45

649 <http://minerals.usgs.gov/minerals/pubs/commodity>, in, 2014.

650 van der Werf, G. R., Randerson, J. T., Giglio, L., Collatz, G. J., Mu, M., Kasibhatla, P. S., Morton, D. C.,  
651 DeFries, R. S., Jin, Y., and van Leeuwen, T. T. : Global fire emissions and the contribution of  
652 deforestation, savanna, forest, agricultural, and peat fires (1997–2009), *Atmos. Chem. Phys.*, 10,  
653 11707–11735, doi:10.1019/acp-11710-11707, 2010.

654 Wang, C., Corbett, J. J., and Firestone, J.: Improving spatial representation of global ship emissions  
655 inventories, *Environ. Sci. Technol.*, 42, 193–199, 2008.

656 Wang, H., Fu, L., and Bi, J.: CO<sub>2</sub> and pollutant emissions from passenger cars in China, *Energ. Policy*, 39,  
657 3005–3011, 2011.

659 Wang, H., Fu, L., Zhou, Y., Du, X., and Ge, W.: Trends in vehicular emissions in China’s mega cities from  
660 1995 to 2005, *Environ. Pollut.*, 158, 394–400, 2010.

661 Wang, H., Zhang, R., Liu, M., and Bi, J.: The carbon emissions of Chinese cities, *Atmos. Chem. Phys.*, 12,  
662 6197-6206, <https://doi.org/10.5194/acp-12-6197-2012>, 2012.

663 Wang, J., Cai, B., Zhang, L., Cao, D., Liu, L., Zhou, Y., Zhang, Z., and Wenbo, X.: High resolution carbon  
664 dioxide emission gridded data for China derived from point sources, *Environmental Science &  
665 Technology*, 48, 7085-7093, 2014.

666 Wang, R., Tao, S., Ciais, P., Shen, H. Z., Huang, Y., Chen, H., Shen, G. F., Wang, B., Li, W., Zhang, Y. Y., Lu,  
667 Y., Zhu, D., Chen, Y. C., Liu, X. P., Wang, W. T., Wang, X. L., Liu, W. X., Li, B. G., and Piao, S. L.:  
668 High-resolution mapping of combustion processes and implications for CO<sub>2</sub> emissions, *Atmos. Chem.  
669 Phys.*, 13, 5189-5203, <https://doi.org/10.5194/acp-13-5189-2013>, 2013.

670 Wheeler, D., and Ummel, K.: Calculating CARMA: Global Estimation of CO<sub>2</sub> Emissions from the Power  
671 Sector, Working Papers, 2008.

672 WSA: Steel statistics, World Steel Association.  
673 <https://www.worldsteel.org/statistics/crude-steel-production.html> 2015.

674 Wu, Y., Streets, D. G., Wang, S. X., and Hao, J. M.: Uncertainties in estimating mercury emissions from  
675 coal-fired power plants in China, *Atmos. Chem. Phys.*, 10, 2937–2946,  
676 doi:10.5194/acp-10-2937-2010, 2010.

677 Yang, X., Huang, Y., Dong, P., Jiang, D., and Liu, H.: An Updating System for the Gridded Population  
678 Database of China Based on Remote Sensing, GIS and Spatial Database Technologies, *Sensors* (Basel,

679 Switzerland), 9, 1128-1140, 10.3390/s90201128, 2009.

680 Yevich, R., and Logan, J. A.: An assessment of biofuel use and burning of agricultural waste in the  
681 developing world, *Global Biogeochemical Cycles*, 17, 1095, doi:10.1029/2002GB001952, 2003.

682 Zhang, H., Ye, X., Cheng, T., Chen, J., Yang, X., Wang, L., and Zhang, R.: A laboratory study of  
683 agricultural crop residue com-bustion in China: emission factors and emission inventory, *Atmos.*  
684 *Environ.*, 42, 8432–8441, 2008.

685 Zhang, Q., Streets, D. G., Carmichael, G. R., He, K. B., Huo, H., Kannari, A., Klimont, Z., Park, I. S., Reddy,  
686 S., Fu, J. S., Chen, D., Duan, L., Lei, Y., Wang, L. T., and Yao, Z. L.: Asian emissions in 2006 for the NASA  
687 INTEX-B mission, *Atmos. Chem. Phys.*, 9, 5131-5153, <https://doi.org/10.5194/acp-9-5131-2009>, 2009.

688 Zhang, Q., Streets, D. G., He, K., Wang, Y., Richter, A., Burrows, J. P., Uno, I., Jang, C. J., Chen, D., Yao, Z.,  
689 and Lei, Y.: NO<sub>x</sub> emission trends for China, 1995–2004: The view from the ground and the view from  
690 space, *J. Geophys. Res.*, 112, D22306, <https://doi.org/22310.21029/22007JD008684>, 2007.

691 Zhang, Y., Tao, S., Cao, J., and Coveney, R. M.: Emission of Polycyclic Aromatic Hydrocarbons in China  
692 by County, *Environmental Science & Technology*, 41, 683-687, 10.1021/es061545h, 2007.

693 Zhao, Y., Nielsen, C. P., and McElroy, M. B.: China's CO<sub>2</sub> emis-sions estimated from the bottom up:  
694 recent trends, spatial distri-butions, and quantification of uncertainties, *Atmos. Environ.*, 59, 214–223,  
695 2012.

696 Zheng, B., Zhang, Q., Davis, S. J., Ciais, P., Hong, C., Li, M., Liu, F., Tong, D., Li, H., and He, K.:  
697 Infrastructure Shapes Differences in the Carbon Intensities of Chinese Cities, *Environmental Science &*  
698 *Technology*, 52, 6032-6041, 10.1021/acs.est.7b05654, 2018.

699 Zheng, B., Huo, H., Zhang, Q., Yao, Z. L., Wang, X. T., Yang, X. F., Liu, H., and He, K. B.: High-resolution  
700 mapping of vehicle emissions in China in 2008, *Atmos. Chem. Phys.*, 14, 9787-9805,  
701 10.5194/acp-14-9787-2014, 2014.

702 Zheng, B., Tong, D., Li, M., Liu, F., Hong, C., Geng, G., Li, H., Li, X., Peng, L., Qi, J., Yan, L., Zhang, Y., Zhao,  
703 H., Zheng, Y., He, K., and Zhang, Q.: Trends in China's anthropogenic emissions since 2010 as the  
704 consequence of clean air actions, *Atmos. Chem. Phys.*, 18, 14095-14111,  
705 <https://doi.org/14010.15194/acp-14018-14095-12018>, , 2018.

706 Zheng, B., Zhang, Q., Tong, D., Chen, C., Hong, C., Li, M., Geng, G., Lei, Y., Huo, H., and He, K.:  
707 Resolution dependence of uncertainties in gridded emission inventories: a case study in Hebei, China,  
708 *Atmos. Chem. Phys.*, 17, <https://doi.org/10.5194/acp-17-921-2017>, 2017.

709 Ziskin, D., Baugh, K., Hsu, F.-C., Ghosh, T., Elvidege, C.: Methods Used For the 2006 Radiance Lights,  
710 *Proc. of the 30th Asia-Pacific Advanced Network Meeting*, 131–114, 2010.

711

712
